# Supplementary material for: Nanotechnological synergy of mangiferin and curcumin in modulating PI3K/Akt/mTOR pathway: a novel front in ovarian cancer precision therapeutics
Source: Front Pharmacol. 2024 Jan 4;14:1276209. doi: 10.3389/fphar.2023.1276209 (PMC10794632; doi:10.3389/fphar.2023.1276209)
Supplement: Supplementary file 1 [file Table2.XLSX]

## Sheet: Sheet1
Time	pi3k-M	pi3k-M-C
0	4	3
0.199998	2	2
0.399996	5	1
0.599994	5	1
0.799992	4	1
0.99999	2	2
1.19999	3	4
1.39999	4	1
1.59998	3	3
1.79998	4	4
1.99998	4	3
2.19998	3	2
2.39998	4	2
2.59997	3	3
2.79997	1	3
2.99997	3	2
3.19997	2	3
3.39997	4	2
3.59996	5	3
3.79996	4	4
3.99996	3	1
4.19996	4	2
4.39996	3	2
4.59995	4	2
4.79995	4	0
4.99995	3	1
5.19995	3	2
5.39995	4	4
5.59994	3	3
5.79994	2	0
5.99994	2	1
6.19994	2	1
6.39994	2	1
6.59993	4	1
6.79993	4	2
6.99993	2	2
7.19993	5	2
7.39993	3	2
7.59992	4	2
7.79992	1	0
7.99992	1	2
8.19992	2	2
8.39992	2	2
8.59991	1	2
8.79991	1	2
8.99991	1	1
9.19991	1	2
9.39991	1	2
9.5999	1	2
9.7999	1	3
9.9999	1	3
10.1999	1	2
10.3999	1	3
10.5999	1	3
10.7999	1	3
10.9999	1	3
11.1999	2	1
11.3999	1	1
11.5999	1	1
11.7999	1	1
11.9999	1	2
12.1999	1	3
12.3999	1	1
12.5999	2	2
12.7999	1	2
12.9999	2	1
13.1999	1	1
13.3999	1	1
13.5999	1	1
13.7999	1	1
13.9999	1	2
14.1999	1	1
14.3999	0	2
14.5999	1	2
14.7999	1	2
14.9999	1	1
15.1998	1	1
15.3998	1	1
15.5998	1	0
15.7998	1	1
15.9998	1	1
16.1998	0	1
16.3998	1	1
16.5998	1	1
16.7998	1	1
16.9998	1	1
17.1998	2	2
17.3998	1	1
17.5998	1	2
17.7998	1	1
17.9998	1	1
18.1998	1	2
18.3998	1	2
18.5998	1	1
18.7998	1	2
18.9998	0	0
19.1998	1	1
19.3998	1	2
19.5998	1	1
19.7998	1	1
19.9998	1	2
20.1998	1	2
20.3998	0	2
20.5998	1	0
20.7998	1	1
20.9998	1	2
21.1998	1	2
21.3998	1	0
21.5998	1	1
21.7998	1	1
21.9998	0	3
22.1998	1	2
22.3998	1	2
22.5998	1	3
22.7998	1	1
22.9998	1	2
23.1998	1	1
23.3998	1	3
23.5998	1	1
23.7998	1	2
23.9998	1	2
24.1998	1	2
24.3998	0	2
24.5998	0	0
24.7998	0	2
24.9997	0	1
25.1997	0	2
25.3997	1	1
25.5997	1	1
25.7997	2	1
25.9997	1	3
26.1997	0	2
26.3997	1	2
26.5997	0	1
26.7997	0	1
26.9997	0	1
27.1997	0	0
27.3997	0	1
27.5997	0	1
27.7997	0	1
27.9997	0	2
28.1997	0	2
28.3997	0	1
28.5997	0	2
28.7997	0	2
28.9997	0	1
29.1997	1	0
29.3997	0	1
29.5997	1	1
29.7997	1	2
29.9997	1	1
30.1997	1	2
30.3997	1	1
30.5997	0	1
30.7997	0	2
30.9997	0	1
31.1997	1	1
31.3997	0	2
31.5997	0	1
31.7997	0	1
31.9997	0	1
32.1997	1	2
32.3997	1	2
32.5997	2	0
32.7997	1	1
32.9997	1	0
33.1997	0	2
33.3997	0	1
33.5997	0	0
33.7997	0	1
33.9997	0	0
34.1997	0	2
34.3997	1	2
34.5997	0	1
34.7997	0	0
34.9997	0	1
35.1996	0	0
35.3996	0	0
35.5996	0	1
35.7996	0	2
35.9996	0	3
36.1996	0	2
36.3996	0	1
36.5996	0	0
36.7996	0	1
36.9996	0	0
37.1996	0	1
37.3996	0	1
37.5996	1	2
37.7996	0	0
37.9996	0	3
38.1996	1	2
38.3996	1	1
38.5996	1	1
38.7996	0	2
38.9996	0	2
39.1996	1	1
39.3996	0	1
39.5996	1	1
39.7996	1	0
39.9996	0	1
40.1996	0	0
40.3996	1	2
40.5996	0	4
40.7996	1	2
40.9996	1	1
41.1996	0	1
41.3996	0	1
41.5996	0	1
41.7996	0	1
41.9996	0	1
42.1996	0	2
42.3996	0	2
42.5996	1	1
42.7996	1	1
42.9996	1	1
43.1996	1	2
43.3996	0	0
43.5996	0	0
43.7996	0	0
43.9996	0	0
44.1996	0	0
44.3996	1	0
44.5996	0	1
44.7996	1	0
44.9995	1	0
45.1995	1	1
45.3995	1	0
45.5995	1	0
45.7995	0	0
45.9995	1	0
46.1995	0	1
46.3995	1	0
46.5995	0	0
46.7995	1	0
46.9995	1	0
47.1995	1	0
47.3995	1	0
47.5995	1	0
47.7995	1	0
47.9995	1	0
48.1995	1	0
48.3995	2	0
48.5995	1	0
48.7995	2	0
48.9995	1	1
49.1995	2	0
49.3995	1	1
49.5995	0	1
49.7995	0	1
49.9995	0	0
50.1995	1	0
50.3995	1	0
50.5995	0	0
50.7995	0	1
50.9995	0	0
51.1995	0	0
51.3995	1	0
51.5995	0	1
51.7995	0	0
51.9995	0	0
52.1995	0	0
52.3995	1	0
52.5995	0	0
52.7995	2	0
52.9995	0	0
53.1995	1	0
53.3995	0	0
53.5995	1	0
53.7995	1	0
53.9995	0	0
54.1995	1	0
54.3995	2	0
54.5995	1	0
54.7995	2	0
54.9995	1	0
55.1994	1	0
55.3994	1	0
55.5994	1	0
55.7994	0	0
55.9994	0	0
56.1994	1	0
56.3994	0	0
56.5994	0	0
56.7994	0	0
56.9994	0	1
57.1994	0	0
57.3994	0	0
57.5994	0	0
57.7994	0	0
57.9994	0	0
58.1994	0	0
58.3994	0	1
58.5994	0	0
58.7994	0	0
58.9994	1	0
59.1994	0	0
59.3994	0	0
59.5994	0	0
59.7994	0	0
59.9994	0	1
60.1994	0	0
60.3994	1	0
60.5994	0	0
60.7994	0	0
60.9994	1	1
61.1994	0	0
61.3994	0	0
61.5994	1	0
61.7994	1	0
61.9994	1	0
62.1994	2	0
62.3994	1	0
62.5994	0	0
62.7994	1	1
62.9994	1	1
63.1994	0	0
63.3994	1	0
63.5994	0	0
63.7994	0	0
63.9994	1	0
64.1994	0	0
64.3994	0	0
64.5994	1	0
64.7994	1	0
64.9994	1	1
65.1993	0	0
65.3993	0	2
65.5993	1	2
65.7993	1	1
65.9993	1	1
66.1993	0	4
66.3993	1	0
66.5993	1	2
66.7993	1	1
66.9993	1	1
67.1993	1	0
67.3993	1	0
67.5993	2	0
67.7993	1	0
67.9993	1	0
68.1993	1	0
68.3993	1	0
68.5993	1	0
68.7993	1	0
68.9993	1	1
69.1993	1	0
69.3993	2	0
69.5993	1	0
69.7993	2	0
69.9993	1	0
70.1993	1	0
70.3993	1	0
70.5993	1	0
70.7993	1	1
70.9993	2	1
71.1993	2	1
71.3993	1	1
71.5993	1	0
71.7993	1	0
71.9993	1	0
72.1993	1	0
72.3993	1	0
72.5993	1	0
72.7993	1	0
72.9993	1	1
73.1993	1	0
73.3993	1	1
73.5993	1	1
73.7993	1	2
73.9993	1	1
74.1993	1	1
74.3993	1	1
74.5993	1	2
74.7993	1	2
74.9993	1	1
75.1992	1	1
75.3992	1	1
75.5992	1	2
75.7992	1	1
75.9992	1	1
76.1992	1	1
76.3992	1	1
76.5992	1	1
76.7992	1	0
76.9992	1	1
77.1992	1	1
77.3992	2	1
77.5992	2	1
77.7992	2	1
77.9992	1	2
78.1992	1	2
78.3992	1	2
78.5992	1	1
78.7992	1	1
78.9992	1	1
79.1992	1	1
79.3992	1	2
79.5992	2	2
79.7992	0	2
79.9992	0	1
80.1992	0	1
80.3992	0	2
80.5992	0	2
80.7992	0	2
80.9992	0	2
81.1992	0	3
81.3992	0	2
81.5992	0	3
81.7992	0	2
81.9992	0	1
82.1992	0	1
82.3992	1	2
82.5992	1	1
82.7992	1	1
82.9992	0	3
83.1992	0	2
83.3992	1	1
83.5992	0	1
83.7992	0	1
83.9992	0	1
84.1992	0	0
84.3992	0	2
84.5992	0	1
84.7992	0	0
84.9992	0	0
85.1991	0	2
85.3991	2	3
85.5991	1	2
85.7991	0	3
85.9991	2	2
86.1991	1	2
86.3991	2	2
86.5991	2	2
86.7991	2	1
86.9991	1	1
87.1991	1	1
87.3991	1	1
87.5991	1	2
87.7991	1	2
87.9991	0	2
88.1991	1	2
88.3991	2	2
88.5991	0	2
88.7991	0	1
88.9991	0	1
89.1991	0	1
89.3991	0	1
89.5991	0	0
89.7991	0	1
89.9991	0	0
90.1991	0	1
90.3991	0	1
90.5991	0	2
90.7991	0	1
90.9991	1	1
91.1991	0	1
91.3991	0	2
91.5991	0	1
91.7991	0	2
91.9991	2	3
92.1991	1	2
92.3991	1	1
92.5991	1	2
92.7991	0	3
92.9991	0	1
93.1991	0	3
93.3991	0	2
93.5991	0	3
93.7991	0	3
93.9991	1	2
94.1991	1	2
94.3991	1	0
94.5991	3	2
94.7991	0	1
94.999	1	3
95.199	1	2
95.399	0	4
95.599	3	3
95.799	0	3
95.999	0	2
96.199	1	1
96.399	2	2
96.599	2	2
96.799	1	3
96.999	3	2
97.199	4	1
97.399	2	3
97.599	3	1
97.799	2	1
97.999	4	2
98.199	3	2
98.399	3	1
98.599	1	2
98.799	3	2
98.999	3	3
99.199	1	2
99.399	3	2
99.599	0	2
99.799	0	2
99.999	0	3
100.199	0	2
100.399	0	1
100.599	0	1
100.799	0	1
100.999	0	1
101.199	0	2
101.399	0	2
101.599	0	2
101.799	0	2
101.999	0	2
102.199	0	2
102.399	0	2
102.599	0	3
102.799	1	3
102.999	0	1
103.199	0	2
103.399	0	3
103.599	1	3
103.799	0	3
103.999	1	2
104.199	1	1
104.399	0	1
104.599	0	2
104.799	0	3
104.999	0	2
105.199	0	1
105.399	0	2
105.599	1	2
105.799	1	2
105.999	0	3
106.199	0	2
106.399	1	1
106.599	0	2
106.799	0	1
106.999	1	2
107.199	1	2
107.399	1	2
107.599	0	1
107.799	1	3
107.999	0	2
108.199	0	2
108.399	0	1
108.599	0	1
108.799	1	2
108.999	0	2
109.199	1	2
109.399	1	1
109.599	0	0
109.799	0	0
109.999	0	0
110.199	0	1
110.399	0	0
110.599	0	0
110.799	0	1
110.999	0	1
111.199	0	0
111.399	0	0
111.599	0	2
111.799	0	1
111.999	2	2
112.199	2	0
112.399	1	1
112.599	2	0
112.799	2	0
112.999	1	0
113.199	3	0
113.399	3	0
113.599	4	1
113.799	4	2
113.999	3	1
114.199	4	2
114.399	0	0
114.599	0	1
114.799	0	2
114.999	0	0
115.199	0	1
115.399	0	2
115.599	0	2
115.799	0	1
115.999	0	2
116.199	0	2
116.399	0	1
116.599	0	1
116.799	0	1
116.999	1	2
117.199	0	3
117.399	0	2
117.599	0	1
117.799	0	1
117.999	0	2
118.199	0	1
118.399	0	0
118.599	2	0
118.799	1	2
118.999	0	2
119.199	2	1
119.399	3	2
119.599	0	1
119.799	1	1
119.999	1	3
120.199	0	2
120.399	1	2
120.599	1	2
120.799	1	2
120.999	1	1
121.199	0	0
121.399	0	0
121.599	0	0
121.799	1	0
121.999	0	0
122.199	0	0
122.399	0	0
122.599	0	0
122.799	0	0
122.999	0	0
123.199	0	0
123.399	0	0
123.599	0	0
123.799	0	0
123.999	0	0
124.199	0	1
124.399	0	0
124.599	0	0
124.799	0	2
124.999	0	2
125.199	0	1
125.399	0	0
125.599	1	0
125.799	0	2
125.999	1	1
126.199	1	1
126.399	1	0
126.599	1	0
126.799	1	0
126.999	1	0
127.199	1	1
127.399	0	2
127.599	1	0
127.799	2	2
127.999	0	2
128.199	0	2
128.399	1	1
128.599	2	1
128.799	1	1
128.999	1	1
129.199	1	2
129.399	1	1
129.599	1	2
129.799	1	3
129.999	0	2
130.199	0	1
130.399	1	1
130.599	1	0
130.799	1	1
130.999	1	1
131.199	0	1
131.399	0	0
131.599	0	0
131.799	1	0
131.999	0	0
132.199	1	0
132.399	1	0
132.599	1	0
132.799	1	1
132.999	1	1
133.199	0	0
133.399	0	0
133.599	0	0
133.799	0	1
133.999	2	0
134.199	0	0
134.399	1	0
134.599	1	0
134.799	0	0
134.999	1	0
135.199	1	0
135.399	1	0
135.599	0	0
135.799	1	0
135.999	0	0
136.199	0	0
136.399	0	0
136.599	0	0
136.799	1	0
136.999	0	0
137.199	1	1
137.399	0	1
137.599	1	0
137.799	1	1
137.999	0	1
138.199	0	0
138.399	1	0
138.599	1	0
138.799	0	0
138.999	0	0
139.199	0	1
139.399	0	0
139.599	0	0
139.799	0	0
139.999	0	0
140.199	0	0
140.399	0	0
140.599	0	1
140.799	0	0
140.999	0	1
141.199	0	0
141.399	0	1
141.599	0	1
141.799	0	1
141.999	1	0
142.199	0	2
142.399	0	1
142.599	1	1
142.799	0	1
142.999	0	2
143.199	0	1
143.399	0	3
143.599	0	2
143.799	0	2
143.999	0	1
144.199	1	2
144.399	0	2
144.599	0	2
144.799	0	0
144.999	0	1
145.199	1	1
145.399	0	2
145.599	0	3
145.799	0	1
145.999	0	1
146.199	0	2
146.399	0	1
146.599	1	0
146.799	0	0
146.999	0	0
147.199	0	0
147.399	0	0
147.599	0	0
147.799	0	2
147.999	1	1
148.199	0	1
148.399	0	0
148.599	1	0
148.799	0	1
148.999	1	0
149.199	1	2
149.399	0	1
149.599	0	0
149.799	0	1
149.999	2	0
150.198	1	3
150.398	0	1
150.598	1	3
150.798	1	2
150.998	0	2
151.198	0	1
151.398	0	1
151.598	0	0
151.798	1	0
151.998	1	1
152.198	1	1
152.398	1	1
152.598	1	1
152.798	3	0
152.998	2	0
153.198	1	0
153.398	1	0
153.598	1	0
153.798	1	0
153.998	2	0
154.198	2	0
154.398	1	0
154.598	1	0
154.798	1	0
154.998	1	0
155.198	1	1
155.398	0	2
155.598	0	0
155.798	1	1
155.998	1	0
156.198	1	2
156.398	2	1
156.598	1	1
156.798	2	1
156.998	2	1
157.198	1	1
157.398	1	0
157.598	1	0
157.798	0	0
157.998	0	0
158.198	0	0
158.398	0	2
158.598	0	1
158.798	0	1
158.998	0	1
159.198	0	1
159.398	0	2
159.598	0	0
159.798	1	0
159.998	0	0
160.198	0	0
160.398	0	0
160.598	0	1
160.798	0	1
160.998	0	0
161.198	1	1
161.398	0	2
161.598	0	1
161.798	0	1
161.998	1	1
162.198	0	1
162.398	0	0
162.598	0	0
162.798	0	0
162.998	1	2
163.198	0	2
163.398	1	2
163.598	0	1
163.798	0	1
163.998	1	0
164.198	0	1
164.398	1	0
164.598	2	0
164.798	1	0
164.998	1	0
165.198	0	1
165.398	2	2
165.598	2	1
165.798	0	1
165.998	1	0
166.198	0	0
166.398	1	1
166.598	0	1
166.798	1	1
166.998	1	0
167.198	1	1
167.398	2	2
167.598	2	2
167.798	0	1
167.998	1	2
168.198	0	0
168.398	0	1
168.598	1	1
168.798	0	2
168.998	0	2
169.198	0	1
169.398	0	1
169.598	1	0
169.798	1	1
169.998	1	1
170.198	0	1
170.398	1	0
170.598	0	0
170.798	0	0
170.998	1	0
171.198	1	1
171.398	1	0
171.598	0	0
171.798	0	1
171.998	0	0
172.198	1	2
172.398	0	1
172.598	0	2
172.798	2	1
172.998	2	2
173.198	0	0
173.398	0	0
173.598	0	0
173.798	0	1
173.998	0	2
174.198	2	1
174.398	1	1
174.598	0	1
174.798	1	2
174.998	0	2
175.198	0	1
175.398	3	2
175.598	1	1
175.798	0	1
175.998	1	1
176.198	3	1
176.398	2	1
176.598	2	0
176.798	1	0
176.998	0	1
177.198	0	1
177.398	0	0
177.598	0	0
177.798	0	0
177.998	0	0
178.198	0	0
178.398	0	0
178.598	1	0
178.798	0	0
178.998	0	0
179.198	0	0
179.398	0	0
179.598	0	0
179.798	0	0
179.998	0	0
180.198	0	0
180.398	0	0
180.598	0	0
180.798	0	0
180.998	0	1
181.198	1	1
181.398	1	1
181.598	2	1
181.798	2	1
181.998	2	1
182.198	0	1
182.398	0	1
182.598	0	1
182.798	0	0
182.998	1	1
183.198	0	0
183.398	1	0
183.598	0	0
183.798	2	0
183.998	2	0
184.198	2	0
184.398	2	0
184.598	3	1
184.798	3	0
184.998	2	0
185.198	0	0
185.398	2	0
185.598	2	0
185.798	2	2
185.998	0	0
186.198	2	0
186.398	0	0
186.598	1	0
186.798	1	0
186.998	1	0
187.198	1	0
187.398	1	0
187.598	1	1
187.798	0	1
187.998	1	0
188.198	3	1
188.398	2	0
188.598	3	0
188.798	1	0
188.998	0	0
189.198	0	0
189.398	0	1
189.598	2	1
189.798	0	1
189.998	0	0
190.198	0	1
190.398	0	1
190.598	0	0
190.798	0	1
190.998	0	0
191.198	0	0
191.398	1	0
191.598	0	0
191.798	0	0
191.998	1	0
192.198	0	1
192.398	0	1
192.598	1	0
192.798	2	0
192.998	1	1
193.198	1	0
193.398	3	0
193.598	1	0
193.798	2	0
193.998	0	0
194.198	0	0
194.398	0	0
194.598	1	1
194.798	0	0
194.998	1	0
195.198	0	0
195.398	0	0
195.598	0	0
195.798	0	0
195.998	0	0
196.198	0	0
196.398	1	1
196.598	0	1
196.798	0	1
196.998	0	0
197.198	1	2
197.398	1	0
197.598	0	0
197.798	1	1
197.998	0	1
198.198	1	1
198.398	1	0
198.598	0	0
198.798	0	1
198.998	0	0
199.198	0	0
199.398	0	2
199.598	0	1
199.798	0	1
199.998	0	1
200	0	1

## Sheet: Sheet2
Time	AKT-M	AKT-M-C
0	1	1
0.100002	1	2
0.200004	1	2
0.300006	1	2
0.400008	2	2
0.50001	2	1
0.600012	1	2
0.700014	2	2
0.800016	2	2
0.900018	1	1
1.00002	2	2
1.10002	2	2
1.20002	2	1
1.30003	2	2
1.40003	2	1
1.50003	2	1
1.60003	2	3
1.70003	2	1
1.80004	2	3
1.90004	1	2
2.00004	1	3
2.10004	1	3
2.20004	2	2
2.30005	2	3
2.40005	2	3
2.50005	2	3
2.60005	1	3
2.70005	1	2
2.80006	1	3
2.90006	1	3
3.00006	1	1
3.10006	2	3
3.20006	1	3
3.30007	1	2
3.40007	1	3
3.50007	1	2
3.60007	1	1
3.70007	2	1
3.80008	2	2
3.90008	1	2
4.00008	1	3
4.10008	1	3
4.20008	2	2
4.30009	1	2
4.40009	1	1
4.50009	1	2
4.60009	1	0
4.70009	1	2
4.8001	1	1
4.9001	1	1
5.0001	1	1
5.1001	1	2
5.2001	1	2
5.30011	1	1
5.40011	1	2
5.50011	1	0
5.60011	1	1
5.70011	1	2
5.80012	1	1
5.90012	1	0
6.00012	1	2
6.10012	1	1
6.20012	1	2
6.30013	1	2
6.40013	1	1
6.50013	1	3
6.60013	1	2
6.70013	2	2
6.80014	1	1
6.90014	1	2
7.00014	1	2
7.10014	1	1
7.20014	1	1
7.30015	1	2
7.40015	1	1
7.50015	2	2
7.60015	1	1
7.70015	1	1
7.80016	1	2
7.90016	1	1
8.00016	1	2
8.10016	1	2
8.20016	1	1
8.30017	1	2
8.40017	1	1
8.50017	1	1
8.60017	1	3
8.70017	1	2
8.80018	1	3
8.90018	1	1
9.00018	2	1
9.10018	1	2
9.20018	1	2
9.30019	1	1
9.40019	1	2
9.50019	1	2
9.60019	1	2
9.70019	1	2
9.8002	1	1
9.9002	1	1
10.0002	1	4
10.1002	1	3
10.2002	1	1
10.3002	1	3
10.4002	1	2
10.5002	1	4
10.6002	1	2
10.7002	1	2
10.8002	1	2
10.9002	1	2
11.0002	1	2
11.1002	1	3
11.2002	1	3
11.3002	2	3
11.4002	1	2
11.5002	1	2
11.6002	1	2
11.7002	1	2
11.8002	1	0
11.9002	1	1
12.0002	1	2
12.1002	1	2
12.2002	1	2
12.3002	1	0
12.4002	1	0
12.5002	1	0
12.6003	1	0
12.7003	1	1
12.8003	1	1
12.9003	1	1
13.0003	2	0
13.1003	2	2
13.2003	1	0
13.3003	1	0
13.4003	1	1
13.5003	2	1
13.6003	2	0
13.7003	1	0
13.8003	1	1
13.9003	1	1
14.0003	1	1
14.1003	1	2
14.2003	1	1
14.3003	1	1
14.4003	2	1
14.5003	1	0
14.6003	2	0
14.7003	1	1
14.8003	1	0
14.9003	1	0
15.0003	1	0
15.1003	2	2
15.2003	2	2
15.3003	3	3
15.4003	1	1
15.5003	1	2
15.6003	1	2
15.7003	1	2
15.8003	1	1
15.9003	0	1
16.0003	1	1
16.1003	0	2
16.2003	0	2
16.3003	0	1
16.4003	1	2
16.5003	2	1
16.6003	3	1
16.7003	2	1
16.8003	1	1
16.9003	1	2
17.0003	2	2
17.1003	1	2
17.2003	1	2
17.3003	2	2
17.4003	1	2
17.5004	1	2
17.6004	1	1
17.7004	1	2
17.8004	1	2
17.9004	0	2
18.0004	3	1
18.1004	1	1
18.2004	1	2
18.3004	1	1
18.4004	2	2
18.5004	0	2
18.6004	1	2
18.7004	2	4
18.8004	2	2
18.9004	1	1
19.0004	1	2
19.1004	2	1
19.2004	1	1
19.3004	2	3
19.4004	2	2
19.5004	2	0
19.6004	3	2
19.7004	1	2
19.8004	1	2
19.9004	1	1
20.0004	1	2
20.1004	0	2
20.2004	1	2
20.3004	0	2
20.4004	1	1
20.5004	1	1
20.6004	1	3
20.7004	0	2
20.8004	1	2
20.9004	1	2
21.0004	2	2
21.1004	1	2
21.2004	2	1
21.3004	2	1
21.4004	1	1
21.5004	1	2
21.6004	0	0
21.7004	1	1
21.8004	1	0
21.9004	1	2
22.0004	1	1
22.1004	0	1
22.2004	0	1
22.3004	0	1
22.4004	1	1
22.5005	0	2
22.6005	0	0
22.7005	0	0
22.8005	0	1
22.9005	0	1
23.0005	0	1
23.1005	0	0
23.2005	0	0
23.3005	0	1
23.4005	0	1
23.5005	0	1
23.6005	0	1
23.7005	1	1
23.8005	0	1
23.9005	0	1
24.0005	0	0
24.1005	0	0
24.2005	2	1
24.3005	0	0
24.4005	0	0
24.5005	0	1
24.6005	0	0
24.7005	0	1
24.8005	0	2
24.9005	0	1
25.0005	0	2
25.1005	0	2
25.2005	0	1
25.3005	0	2
25.4005	0	0
25.5005	0	1
25.6005	0	0
25.7005	0	1
25.8005	0	2
25.9005	0	2
26.0005	0	2
26.1005	0	1
26.2005	1	3
26.3005	1	2
26.4005	1	1
26.5005	1	2
26.6005	2	1
26.7005	0	1
26.8005	2	1
26.9005	1	2
27.0005	1	1
27.1005	1	0
27.2005	1	1
27.3005	1	1
27.4005	1	1
27.5006	1	1
27.6006	1	1
27.7006	1	0
27.8006	2	1
27.9006	1	0
28.0006	1	1
28.1006	1	0
28.2006	1	1
28.3006	1	0
28.4006	1	0
28.5006	1	0
28.6006	1	1
28.7006	1	1
28.8006	1	0
28.9006	1	0
29.0006	1	0
29.1006	1	1
29.2006	1	0
29.3006	1	1
29.4006	1	0
29.5006	1	1
29.6006	1	0
29.7006	1	0
29.8006	1	0
29.9006	0	0
30.0006	2	0
30.1006	1	1
30.2006	0	0
30.3006	1	0
30.4006	1	1
30.5006	0	0
30.6006	0	1
30.7006	1	1
30.8006	1	1
30.9006	2	1
31.0006	1	1
31.1006	1	2
31.2006	1	0
31.3006	2	1
31.4006	1	1
31.5006	1	0
31.6006	1	0
31.7006	1	0
31.8006	0	1
31.9006	1	0
32.0006	0	0
32.1006	0	1
32.2006	0	0
32.3006	0	1
32.4006	0	0
32.5007	0	1
32.6007	0	0
32.7007	1	0
32.8007	1	0
32.9007	2	1
33.0007	2	0
33.1007	2	0
33.2007	2	0
33.3007	0	0
33.4007	1	0
33.5007	1	0
33.6007	2	1
33.7007	0	1
33.8007	0	0
33.9007	0	0
34.0007	0	1
34.1007	0	1
34.2007	0	1
34.3007	0	0
34.4007	0	0
34.5007	0	1
34.6007	0	1
34.7007	0	1
34.8007	0	0
34.9007	0	1
35.0007	0	1
35.1007	0	1
35.2007	0	1
35.3007	0	2
35.4007	0	0
35.5007	0	0
35.6007	0	0
35.7007	0	0
35.8007	0	0
35.9007	0	0
36.0007	0	0
36.1007	0	0
36.2007	0	0
36.3007	0	1
36.4007	0	0
36.5007	0	1
36.6007	0	0
36.7007	1	0
36.8007	1	0
36.9007	1	0
37.0007	1	0
37.1007	1	0
37.2007	1	1
37.3007	1	1
37.4007	1	0
37.5007	1	0
37.6008	0	0
37.7008	0	1
37.8008	0	0
37.9008	0	0
38.0008	0	0
38.1008	0	1
38.2008	0	1
38.3008	1	1
38.4008	0	0
38.5008	0	1
38.6008	0	1
38.7008	1	1
38.8008	1	2
38.9008	1	2
39.0008	1	1
39.1008	1	1
39.2008	2	1
39.3008	2	2
39.4008	2	1
39.5008	1	3
39.6008	1	2
39.7008	0	2
39.8008	0	1
39.9008	0	2
40.0008	0	2
40.1008	0	3
40.2008	0	1
40.3008	0	2
40.4008	0	2
40.5008	0	2
40.6008	0	1
40.7008	0	1
40.8008	0	2
40.9008	0	2
41.0008	0	2
41.1008	0	3
41.2008	0	2
41.3008	0	1
41.4008	0	2
41.5008	0	3
41.6008	0	2
41.7008	0	3
41.8008	0	3
41.9008	0	3
42.0008	0	2
42.1008	0	2
42.2008	0	1
42.3008	0	3
42.4008	0	3
42.5008	0	1
42.6009	1	3
42.7009	2	2
42.8009	0	2
42.9009	1	3
43.0009	1	1
43.1009	1	2
43.2009	2	2
43.3009	3	2
43.4009	0	3
43.5009	1	1
43.6009	1	2
43.7009	1	3
43.8009	0	3
43.9009	1	1
44.0009	2	3
44.1009	2	1
44.2009	1	1
44.3009	0	1
44.4009	0	1
44.5009	0	1
44.6009	0	2
44.7009	0	2
44.8009	0	2
44.9009	0	3
45.0009	0	1
45.1009	0	2
45.2009	1	1
45.3009	1	2
45.4009	0	1
45.5009	0	2
45.6009	0	2
45.7009	0	2
45.8009	0	1
45.9009	0	2
46.0009	0	1
46.1009	1	1
46.2009	0	2
46.3009	0	2
46.4009	0	2
46.5009	0	3
46.6009	0	2
46.7009	0	2
46.8009	0	1
46.9009	0	1
47.0009	0	3
47.1009	0	1
47.2009	0	4
47.3009	0	2
47.4009	0	2
47.501	0	2
47.601	0	1
47.701	0	3
47.801	0	2
47.901	0	1
48.001	0	2
48.101	0	3
48.201	0	1
48.301	0	1
48.401	0	1
48.501	0	1
48.601	0	3
48.701	0	1
48.801	0	1
48.901	0	1
49.001	0	1
49.101	0	2
49.201	0	1
49.301	0	1
49.401	1	1
49.501	0	1
49.601	0	1
49.701	0	1
49.801	0	1
49.901	0	1
50.001	0	1
50.101	0	1
50.201	0	2
50.301	0	2
50.401	0	2
50.501	0	2
50.601	0	3
50.701	0	2
50.801	0	3
50.901	0	2
51.001	0	1
51.101	0	1
51.201	0	1
51.301	0	1
51.401	0	2
51.501	0	1
51.601	0	2
51.701	0	2
51.801	0	1
51.901	0	2
52.001	0	1
52.101	0	2
52.201	0	3
52.301	0	2
52.401	0	3
52.501	0	2
52.6011	0	1
52.7011	0	1
52.8011	1	2
52.9011	0	1
53.0011	0	1
53.1011	0	2
53.2011	0	2
53.3011	0	3
53.4011	1	2
53.5011	0	3
53.6011	0	1
53.7011	0	1
53.8011	0	2
53.9011	0	1
54.0011	0	3
54.1011	0	1
54.2011	0	2
54.3011	0	3
54.4011	0	1
54.5011	0	2
54.6011	0	1
54.7011	0	1
54.8011	0	1
54.9011	0	3
55.0011	0	1
55.1011	0	1
55.2011	0	2
55.3011	0	1
55.4011	0	1
55.5011	0	2
55.6011	0	2
55.7011	0	2
55.8011	0	1
55.9011	0	2
56.0011	0	1
56.1011	1	1
56.2011	0	1
56.3011	0	2
56.4011	1	2
56.5011	1	2
56.6011	0	2
56.7011	0	3
56.8011	1	2
56.9011	0	3
57.0011	0	2
57.1011	0	2
57.2011	1	1
57.3011	0	2
57.4011	0	3
57.5012	0	1
57.6012	0	2
57.7012	0	1
57.8012	0	1
57.9012	0	1
58.0012	0	1
58.1012	0	1
58.2012	1	1
58.3012	0	2
58.4012	0	2
58.5012	0	1
58.6012	0	2
58.7012	0	3
58.8012	0	0
58.9012	0	0
59.0012	0	1
59.1012	0	2
59.2012	1	3
59.3012	0	1
59.4012	0	3
59.5012	0	1
59.6012	0	1
59.7012	0	1
59.8012	0	1
59.9012	0	0
60.0012	0	0
60.1012	0	0
60.2012	0	1
60.3012	0	1
60.4012	0	1
60.5012	0	0
60.6012	0	0
60.7012	0	0
60.8012	0	0
60.9012	0	1
61.0012	0	1
61.1012	0	1
61.2012	0	1
61.3012	0	2
61.4012	0	3
61.5012	0	3
61.6012	0	1
61.7012	1	0
61.8012	0	0
61.9012	0	0
62.0012	0	0
62.1012	0	0
62.2012	0	2
62.3012	0	0
62.4012	0	0
62.5012	0	0
62.6013	0	1
62.7013	0	0
62.8013	0	1
62.9013	0	0
63.0013	1	0
63.1013	0	0
63.2013	0	0
63.3013	0	1
63.4013	0	1
63.5013	0	1
63.6013	0	1
63.7013	0	2
63.8013	0	0
63.9013	0	0
64.0013	0	1
64.1013	0	2
64.2013	0	0
64.3013	0	0
64.4013	0	0
64.5013	0	0
64.6013	1	1
64.7013	0	0
64.8013	0	0
64.9013	0	1
65.0013	1	0
65.1013	0	0
65.2013	0	0
65.3013	0	2
65.4013	0	1
65.5013	0	1
65.6013	1	0
65.7013	0	0
65.8013	1	1
65.9013	0	0
66.0013	1	1
66.1013	0	0
66.2013	0	1
66.3013	1	3
66.4013	0	2
66.5013	0	1
66.6013	0	0
66.7013	0	1
66.8013	0	0
66.9013	1	0
67.0013	1	0
67.1013	0	1
67.2013	0	1
67.3013	0	0
67.4013	0	2
67.5014	0	2
67.6014	0	2
67.7014	0	1
67.8014	0	2
67.9014	0	2
68.0014	0	2
68.1014	0	3
68.2014	0	2
68.3014	0	1
68.4014	0	2
68.5014	1	1
68.6014	0	2
68.7014	0	2
68.8014	0	2
68.9014	0	2
69.0014	0	1
69.1014	0	2
69.2014	0	2
69.3014	0	2
69.4014	0	2
69.5014	0	2
69.6014	0	2
69.7014	0	2
69.8014	0	2
69.9014	0	3
70.0014	1	2
70.1014	0	2
70.2014	0	2
70.3014	0	3
70.4014	0	2
70.5014	1	2
70.6014	0	2
70.7014	0	3
70.8014	1	3
70.9014	0	1
71.0014	0	1
71.1014	0	1
71.2014	0	2
71.3014	0	2
71.4014	0	1
71.5014	0	2
71.6014	0	1
71.7014	0	2
71.8014	0	2
71.9014	0	1
72.0014	0	1
72.1014	0	2
72.2014	0	2
72.3014	0	1
72.4014	0	2
72.5015	0	2
72.6015	0	2
72.7015	0	3
72.8015	1	2
72.9015	1	2
73.0015	0	2
73.1015	1	2
73.2015	0	1
73.3015	0	2
73.4015	0	2
73.5015	0	2
73.6015	0	2
73.7015	0	1
73.8015	0	1
73.9015	0	2
74.0015	0	2
74.1015	0	2
74.2015	0	1
74.3015	0	2
74.4015	0	2
74.5015	0	2
74.6015	0	2
74.7015	0	1
74.8015	0	0
74.9015	0	0
75.0015	0	2
75.1015	0	2
75.2015	0	1
75.3015	1	3
75.4015	1	3
75.5015	1	3
75.6015	1	3
75.7015	0	1
75.8015	0	1
75.9015	1	1
76.0015	1	0
76.1015	1	0
76.2015	1	0
76.3015	1	0
76.4015	1	0
76.5015	0	1
76.6015	1	0
76.7015	1	1
76.8015	0	1
76.9015	0	2
77.0015	0	1
77.1015	1	0
77.2015	1	0
77.3015	1	1
77.4015	0	0
77.5015	1	1
77.6016	1	1
77.7016	0	0
77.8016	1	0
77.9016	1	2
78.0016	0	1
78.1016	1	2
78.2016	0	0
78.3016	1	1
78.4016	1	0
78.5016	1	1
78.6016	1	0
78.7016	1	1
78.8016	0	1
78.9016	1	1
79.0016	0	2
79.1016	1	0
79.2016	0	0
79.3016	0	0
79.4016	1	1
79.5016	1	2
79.6016	1	1
79.7016	0	0
79.8016	1	0
79.9016	1	2
80.0016	1	2
80.1016	1	2
80.2016	1	1
80.3016	1	1
80.4016	1	1
80.5016	1	1
80.6016	0	0
80.7016	0	0
80.8016	1	0
80.9016	0	0
81.0016	0	0
81.1016	1	0
81.2016	0	0
81.3016	0	0
81.4016	0	0
81.5016	0	0
81.6016	1	0
81.7016	1	1
81.8016	1	0
81.9016	1	1
82.0016	1	1
82.1016	1	0
82.2016	1	0
82.3016	0	1
82.4016	1	2
82.5016	1	2
82.6017	1	2
82.7017	1	0
82.8017	1	0
82.9017	1	0
83.0017	1	0
83.1017	1	1
83.2017	1	1
83.3017	1	2
83.4017	1	1
83.5017	1	2
83.6017	1	1
83.7017	1	0
83.8017	1	0
83.9017	1	0
84.0017	0	1
84.1017	1	1
84.2017	0	1
84.3017	1	2
84.4017	1	1
84.5017	1	2
84.6017	0	2
84.7017	1	2
84.8017	1	2
84.9017	0	2
85.0017	1	1
85.1017	1	2
85.2017	1	0
85.3017	1	1
85.4017	1	1
85.5017	0	2
85.6017	0	3
85.7017	0	2
85.8017	0	2
85.9017	1	2
86.0017	1	2
86.1017	1	2
86.2017	1	2
86.3017	1	2
86.4017	0	2
86.5017	1	1
86.6017	1	2
86.7017	0	2
86.8017	1	2
86.9017	1	2
87.0017	1	2
87.1017	1	2
87.2017	0	2
87.3017	1	2
87.4017	1	2
87.5018	1	2
87.6018	0	1
87.7018	1	1
87.8018	1	2
87.9018	0	2
88.0018	0	2
88.1018	1	2
88.2018	0	2
88.3018	1	2
88.4018	0	1
88.5018	0	2
88.6018	1	2
88.7018	1	2
88.8018	0	2
88.9018	1	2
89.0018	1	2
89.1018	1	2
89.2018	1	2
89.3018	1	2
89.4018	1	3
89.5018	1	1
89.6018	1	2
89.7018	1	2
89.8018	1	2
89.9018	0	2
90.0018	1	1
90.1018	1	2
90.2018	1	2
90.3018	1	2
90.4018	1	2
90.5018	1	2
90.6018	1	2
90.7018	1	2
90.8018	0	2
90.9018	1	2
91.0018	1	2
91.1018	1	3
91.2018	1	2
91.3018	1	1
91.4018	1	2
91.5018	1	2
91.6018	1	2
91.7018	0	1
91.8018	0	2
91.9018	0	2
92.0018	0	2
92.1018	0	2
92.2018	0	1
92.3018	0	2
92.4018	0	2
92.5019	0	3
92.6019	0	2
92.7019	0	2
92.8019	0	2
92.9019	0	2
93.0019	0	1
93.1019	0	1
93.2019	0	3
93.3019	0	3
93.4019	0	1
93.5019	0	2
93.6019	0	2
93.7019	0	1
93.8019	0	1
93.9019	0	3
94.0019	0	3
94.1019	0	2
94.2019	0	1
94.3019	0	2
94.4019	0	3
94.5019	0	2
94.6019	0	2
94.7019	0	2
94.8019	0	2
94.9019	0	2
95.0019	0	3
95.1019	0	1
95.2019	0	2
95.3019	0	2
95.4019	0	3
95.5019	0	2
95.6019	0	2
95.7019	0	3
95.8019	0	2
95.9019	0	3
96.0019	0	2
96.1019	0	2
96.2019	0	2
96.3019	0	2
96.4019	0	1
96.5019	0	2
96.6019	0	2
96.7019	0	2
96.8019	0	3
96.9019	0	2
97.0019	0	2
97.1019	0	2
97.2019	0	3
97.3019	0	2
97.4019	0	2
97.5019	0	3
97.602	0	1
97.702	0	2
97.802	0	2
97.902	0	1
98.002	0	1
98.102	0	1
98.202	0	2
98.302	0	2
98.402	0	1
98.502	0	1
98.602	0	2
98.702	0	1
98.802	0	1
98.902	0	2
99.002	0	1
99.102	0	1
99.202	0	1
99.302	0	1
99.402	0	2
99.502	0	1
99.602	0	1
99.702	0	1
99.802	0	1
99.902	0	1
100	0	1

## Sheet: Sheet3
Timee	mtor-M	mTOR-M-C
0	0	0
0.100002	0	0
0.200004	0	1
0.300006	0	1
0.400008	0	1
0.50001	0	1
0.600012	0	1
0.700014	0	1
0.800016	0	1
0.900018	0	1
1.00002	0	1
1.10002	0	1
1.20002	0	1
1.30003	0	1
1.40003	0	1
1.50003	0	1
1.60003	0	1
1.70003	0	1
1.80004	0	1
1.90004	0	0
2.00004	0	0
2.10004	0	0
2.20004	0	0
2.30005	0	0
2.40005	0	0
2.50005	0	1
2.60005	0	1
2.70005	0	0
2.80006	0	1
2.90006	0	0
3.00006	0	0
3.10006	0	1
3.20006	0	0
3.30007	0	1
3.40007	0	1
3.50007	0	1
3.60007	0	1
3.70007	0	0
3.80008	0	1
3.90008	0	1
4.00008	0	1
4.10008	0	1
4.20008	0	1
4.30009	0	1
4.40009	0	0
4.50009	0	0
4.60009	0	1
4.70009	0	1
4.8001	0	1
4.9001	0	1
5.0001	0	1
5.1001	0	1
5.2001	0	1
5.30011	0	0
5.40011	0	0
5.50011	0	1
5.60011	0	0
5.70011	0	0
5.80012	0	0
5.90012	0	1
6.00012	0	0
6.10012	0	1
6.20012	0	1
6.30013	0	1
6.40013	0	1
6.50013	0	1
6.60013	0	1
6.70013	0	1
6.80014	0	0
6.90014	0	0
7.00014	0	1
7.10014	0	2
7.20014	0	0
7.30015	0	0
7.40015	0	1
7.50015	0	0
7.60015	0	1
7.70015	0	0
7.80016	0	0
7.90016	0	0
8.00016	0	1
8.10016	0	0
8.20016	0	0
8.30017	0	0
8.40017	0	0
8.50017	0	0
8.60017	0	0
8.70017	0	1
8.80018	0	1
8.90018	0	0
9.00018	0	1
9.10018	0	1
9.20018	0	0
9.30019	0	0
9.40019	0	0
9.50019	0	0
9.60019	0	1
9.70019	0	2
9.8002	0	1
9.9002	0	0
10.0002	0	1
10.1002	0	1
10.2002	0	0
10.3002	0	1
10.4002	0	1
10.5002	0	0
10.6002	0	0
10.7002	0	0
10.8002	0	0
10.9002	0	1
11.0002	0	1
11.1002	0	1
11.2002	0	0
11.3002	0	0
11.4002	0	0
11.5002	0	1
11.6002	0	0
11.7002	0	1
11.8002	0	0
11.9002	0	0
12.0002	0	1
12.1002	0	0
12.2002	0	1
12.3002	0	0
12.4002	0	0
12.5002	0	0
12.6003	0	1
12.7003	0	0
12.8003	0	0
12.9003	0	0
13.0003	0	0
13.1003	0	0
13.2003	0	0
13.3003	0	0
13.4003	0	0
13.5003	0	0
13.6003	0	0
13.7003	0	0
13.8003	0	0
13.9003	0	1
14.0003	0	0
14.1003	0	0
14.2003	0	0
14.3003	0	0
14.4003	0	0
14.5003	0	1
14.6003	0	1
14.7003	0	0
14.8003	0	1
14.9003	0	0
15.0003	0	0
15.1003	0	0
15.2003	0	0
15.3003	0	1
15.4003	0	0
15.5003	0	0
15.6003	0	1
15.7003	0	1
15.8003	0	3
15.9003	0	0
16.0003	0	1
16.1003	0	1
16.2003	0	1
16.3003	0	0
16.4003	0	0
16.5003	0	1
16.6003	0	0
16.7003	0	0
16.8003	0	1
16.9003	0	0
17.0003	0	0
17.1003	0	0
17.2003	0	0
17.3003	0	0
17.4003	0	0
17.5004	0	0
17.6004	0	1
17.7004	0	2
17.8004	0	0
17.9004	0	0
18.0004	0	1
18.1004	0	0
18.2004	0	1
18.3004	0	0
18.4004	0	0
18.5004	0	1
18.6004	0	2
18.7004	0	1
18.8004	0	0
18.9004	0	0
19.0004	0	0
19.1004	0	1
19.2004	0	1
19.3004	0	1
19.4004	0	0
19.5004	0	1
19.6004	0	1
19.7004	0	0
19.8004	0	0
19.9004	0	1
20.0004	0	1
20.1004	0	0
20.2004	0	0
20.3004	0	0
20.4004	0	1
20.5004	0	1
20.6004	0	1
20.7004	0	0
20.8004	0	0
20.9004	0	0
21.0004	0	0
21.1004	0	1
21.2004	0	1
21.3004	0	0
21.4004	0	1
21.5004	0	1
21.6004	0	1
21.7004	0	0
21.8004	0	1
21.9004	0	1
22.0004	0	1
22.1004	0	0
22.2004	0	1
22.3004	0	1
22.4004	0	0
22.5005	0	1
22.6005	0	1
22.7005	0	0
22.8005	0	0
22.9005	0	1
23.0005	0	1
23.1005	0	0
23.2005	0	1
23.3005	0	0
23.4005	0	0
23.5005	0	1
23.6005	0	1
23.7005	0	1
23.8005	0	1
23.9005	0	2
24.0005	0	2
24.1005	0	1
24.2005	0	1
24.3005	0	0
24.4005	0	1
24.5005	0	1
24.6005	0	1
24.7005	0	1
24.8005	0	1
24.9005	0	1
25.0005	0	1
25.1005	0	1
25.2005	0	1
25.3005	0	1
25.4005	0	1
25.5005	0	1
25.6005	0	1
25.7005	0	1
25.8005	0	1
25.9005	0	2
26.0005	0	1
26.1005	0	1
26.2005	0	2
26.3005	0	0
26.4005	0	2
26.5005	0	2
26.6005	0	1
26.7005	0	1
26.8005	0	1
26.9005	0	1
27.0005	0	1
27.1005	0	0
27.2005	0	1
27.3005	0	1
27.4005	0	1
27.5006	0	0
27.6006	0	1
27.7006	0	1
27.8006	0	0
27.9006	0	1
28.0006	0	2
28.1006	0	1
28.2006	0	0
28.3006	0	0
28.4006	0	1
28.5006	0	1
28.6006	0	1
28.7006	0	0
28.8006	0	0
28.9006	0	1
29.0006	0	0
29.1006	0	1
29.2006	0	0
29.3006	0	1
29.4006	0	1
29.5006	0	1
29.6006	0	0
29.7006	0	1
29.8006	0	1
29.9006	0	1
30.0006	0	0
30.1006	0	1
30.2006	0	1
30.3006	0	0
30.4006	0	1
30.5006	0	0
30.6006	0	0
30.7006	0	0
30.8006	0	0
30.9006	0	1
31.0006	0	0
31.1006	0	0
31.2006	0	0
31.3006	0	0
31.4006	0	1
31.5006	0	1
31.6006	0	1
31.7006	0	1
31.8006	0	1
31.9006	0	2
32.0006	0	1
32.1006	0	1
32.2006	0	1
32.3006	0	1
32.4006	0	1
32.5007	0	0
32.6007	0	0
32.7007	0	0
32.8007	0	1
32.9007	0	1
33.0007	0	0
33.1007	0	2
33.2007	0	1
33.3007	0	1
33.4007	0	1
33.5007	1	1
33.6007	0	1
33.7007	0	1
33.8007	0	1
33.9007	0	0
34.0007	0	1
34.1007	0	1
34.2007	0	1
34.3007	0	0
34.4007	0	0
34.5007	0	1
34.6007	0	1
34.7007	0	1
34.8007	0	1
34.9007	0	1
35.0007	0	1
35.1007	0	1
35.2007	0	1
35.3007	0	1
35.4007	0	1
35.5007	0	1
35.6007	0	1
35.7007	0	1
35.8007	0	1
35.9007	0	1
36.0007	0	1
36.1007	0	1
36.2007	0	1
36.3007	0	0
36.4007	0	1
36.5007	0	1
36.6007	0	1
36.7007	0	1
36.8007	0	1
36.9007	0	2
37.0007	0	1
37.1007	0	1
37.2007	0	1
37.3007	0	1
37.4007	0	1
37.5007	0	1
37.6008	0	1
37.7008	0	0
37.8008	0	1
37.9008	0	1
38.0008	0	0
38.1008	0	1
38.2008	0	0
38.3008	0	0
38.4008	0	0
38.5008	0	0
38.6008	0	0
38.7008	0	1
38.8008	0	0
38.9008	0	0
39.0008	0	0
39.1008	0	0
39.2008	0	0
39.3008	0	0
39.4008	0	0
39.5008	0	0
39.6008	0	0
39.7008	0	0
39.8008	0	1
39.9008	0	0
40.0008	0	0
40.1008	0	0
40.2008	0	0
40.3008	0	0
40.4008	0	0
40.5008	0	0
40.6008	0	0
40.7008	0	0
40.8008	0	0
40.9008	0	0
41.0008	0	0
41.1008	0	0
41.2008	0	0
41.3008	0	0
41.4008	0	0
41.5008	0	0
41.6008	0	0
41.7008	0	0
41.8008	0	0
41.9008	0	0
42.0008	0	0
42.1008	0	0
42.2008	0	1
42.3008	0	0
42.4008	0	0
42.5008	0	0
42.6009	0	0
42.7009	0	1
42.8009	0	0
42.9009	0	0
43.0009	0	0
43.1009	0	0
43.2009	0	0
43.3009	0	0
43.4009	0	0
43.5009	0	0
43.6009	0	0
43.7009	0	0
43.8009	0	0
43.9009	0	0
44.0009	0	0
44.1009	0	0
44.2009	0	0
44.3009	0	0
44.4009	0	0
44.5009	0	0
44.6009	0	0
44.7009	0	0
44.8009	0	0
44.9009	0	0
45.0009	0	1
45.1009	0	0
45.2009	0	0
45.3009	0	0
45.4009	0	0
45.5009	0	0
45.6009	0	0
45.7009	0	0
45.8009	0	0
45.9009	0	0
46.0009	0	0
46.1009	0	1
46.2009	0	0
46.3009	0	0
46.4009	0	0
46.5009	0	0
46.6009	0	1
46.7009	0	1
46.8009	0	1
46.9009	0	0
47.0009	0	1
47.1009	0	1
47.2009	0	0
47.3009	0	0
47.4009	0	0
47.501	0	0
47.601	0	1
47.701	0	1
47.801	0	0
47.901	0	0
48.001	0	0
48.101	0	0
48.201	0	0
48.301	0	0
48.401	0	0
48.501	0	0
48.601	0	1
48.701	0	0
48.801	0	1
48.901	0	0
49.001	0	1
49.101	0	0
49.201	0	1
49.301	1	0
49.401	0	0
49.501	0	2
49.601	0	0
49.701	0	0
49.801	0	0
49.901	0	1
50.001	0	0
50.101	0	0
50.201	0	0
50.301	0	0
50.401	0	1
50.501	0	1
50.601	0	0
50.701	1	0
50.801	0	1
50.901	0	0
51.001	0	0
51.101	0	1
51.201	0	0
51.301	0	0
51.401	0	0
51.501	0	1
51.601	0	1
51.701	0	0
51.801	0	1
51.901	0	0
52.001	1	0
52.101	0	0
52.201	0	0
52.301	0	0
52.401	0	0
52.501	0	0
52.6011	0	0
52.7011	1	0
52.8011	0	1
52.9011	0	0
53.0011	0	0
53.1011	0	0
53.2011	0	0
53.3011	1	1
53.4011	1	0
53.5011	0	0
53.6011	0	0
53.7011	0	0
53.8011	0	0
53.9011	0	0
54.0011	0	0
54.1011	0	0
54.2011	0	0
54.3011	1	0
54.4011	0	0
54.5011	0	0
54.6011	0	0
54.7011	1	0
54.8011	1	0
54.9011	1	0
55.0011	0	0
55.1011	0	0
55.2011	0	0
55.3011	0	0
55.4011	0	0
55.5011	0	0
55.6011	0	0
55.7011	1	0
55.8011	0	0
55.9011	0	0
56.0011	0	0
56.1011	0	0
56.2011	1	0
56.3011	0	0
56.4011	0	0
56.5011	0	0
56.6011	1	0
56.7011	0	0
56.8011	0	0
56.9011	0	0
57.0011	0	0
57.1011	0	0
57.2011	0	0
57.3011	0	0
57.4011	0	0
57.5012	0	0
57.6012	0	0
57.7012	0	0
57.8012	1	0
57.9012	0	0
58.0012	0	0
58.1012	0	0
58.2012	0	1
58.3012	0	1
58.4012	1	1
58.5012	0	0
58.6012	0	0
58.7012	1	0
58.8012	0	0
58.9012	0	1
59.0012	1	1
59.1012	0	0
59.2012	0	1
59.3012	0	0
59.4012	0	1
59.5012	0	1
59.6012	0	1
59.7012	1	0
59.8012	0	0
59.9012	0	1
60.0012	0	0
60.1012	0	1
60.2012	0	0
60.3012	1	1
60.4012	0	1
60.5012	0	1
60.6012	0	1
60.7012	0	1
60.8012	0	1
60.9012	0	0
61.0012	0	1
61.1012	0	1
61.2012	0	1
61.3012	0	1
61.4012	0	1
61.5012	0	1
61.6012	0	1
61.7012	0	1
61.8012	0	1
61.9012	0	1
62.0012	0	1
62.1012	0	1
62.2012	0	1
62.3012	0	1
62.4012	0	1
62.5012	0	1
62.6013	0	1
62.7013	0	1
62.8013	0	1
62.9013	0	0
63.0013	0	1
63.1013	0	1
63.2013	0	1
63.3013	0	1
63.4013	0	0
63.5013	0	1
63.6013	0	1
63.7013	0	1
63.8013	0	1
63.9013	0	0
64.0013	0	0
64.1013	0	1
64.2013	0	0
64.3013	0	0
64.4013	0	0
64.5013	0	1
64.6013	0	1
64.7013	0	1
64.8013	0	0
64.9013	0	1
65.0013	0	0
65.1013	0	1
65.2013	0	2
65.3013	0	1
65.4013	0	1
65.5013	0	0
65.6013	0	0
65.7013	0	1
65.8013	0	1
65.9013	0	1
66.0013	0	1
66.1013	0	1
66.2013	0	1
66.3013	0	0
66.4013	0	1
66.5013	0	1
66.6013	0	1
66.7013	0	1
66.8013	0	1
66.9013	0	1
67.0013	0	1
67.1013	0	0
67.2013	0	2
67.3013	0	1
67.4013	0	1
67.5014	0	1
67.6014	0	1
67.7014	0	1
67.8014	0	1
67.9014	0	1
68.0014	0	1
68.1014	0	1
68.2014	0	1
68.3014	0	1
68.4014	0	1
68.5014	0	0
68.6014	0	1
68.7014	0	1
68.8014	0	0
68.9014	0	1
69.0014	0	1
69.1014	0	1
69.2014	0	1
69.3014	0	0
69.4014	0	1
69.5014	0	1
69.6014	0	1
69.7014	0	1
69.8014	0	1
69.9014	0	1
70.0014	0	1
70.1014	0	1
70.2014	0	1
70.3014	1	1
70.4014	0	1
70.5014	0	1
70.6014	0	1
70.7014	0	0
70.8014	0	1
70.9014	0	2
71.0014	0	1
71.1014	0	1
71.2014	0	1
71.3014	0	2
71.4014	0	1
71.5014	0	1
71.6014	0	1
71.7014	0	1
71.8014	1	1
71.9014	1	1
72.0014	1	1
72.1014	1	0
72.2014	1	1
72.3014	0	1
72.4014	0	1
72.5015	1	0
72.6015	1	1
72.7015	0	1
72.8015	0	1
72.9015	1	1
73.0015	1	0
73.1015	1	0
73.2015	0	1
73.3015	0	1
73.4015	1	0
73.5015	1	0
73.6015	1	0
73.7015	1	1
73.8015	1	0
73.9015	0	1
74.0015	0	1
74.1015	0	0
74.2015	0	1
74.3015	0	1
74.4015	0	1
74.5015	0	1
74.6015	0	0
74.7015	1	1
74.8015	0	1
74.9015	1	1
75.0015	1	0
75.1015	1	1
75.2015	1	1
75.3015	0	1
75.4015	1	1
75.5015	1	1
75.6015	1	0
75.7015	0	0
75.8015	1	1
75.9015	0	1
76.0015	0	0
76.1015	1	1
76.2015	1	1
76.3015	2	1
76.4015	0	1
76.5015	1	1
76.6015	0	1
76.7015	0	1
76.8015	0	1
76.9015	1	1
77.0015	1	1
77.1015	1	0
77.2015	0	0
77.3015	1	0
77.4015	1	1
77.5015	1	1
77.6016	1	1
77.7016	1	1
77.8016	0	1
77.9016	0	1
78.0016	1	1
78.1016	0	0
78.2016	0	0
78.3016	0	1
78.4016	1	1
78.5016	1	1
78.6016	1	0
78.7016	0	1
78.8016	1	1
78.9016	0	1
79.0016	1	1
79.1016	0	1
79.2016	1	1
79.3016	0	1
79.4016	0	2
79.5016	0	1
79.6016	0	1
79.7016	0	2
79.8016	0	1
79.9016	0	1
80.0016	0	1
80.1016	0	2
80.2016	0	2
80.3016	0	1
80.4016	0	1
80.5016	0	2
80.6016	0	1
80.7016	0	1
80.8016	0	1
80.9016	0	0
81.0016	0	0
81.1016	0	0
81.2016	1	1
81.3016	1	1
81.4016	1	0
81.5016	1	1
81.6016	1	2
81.7016	1	0
81.8016	0	1
81.9016	0	1
82.0016	0	0
82.1016	0	2
82.2016	0	2
82.3016	0	0
82.4016	1	1
82.5016	0	1
82.6017	1	0
82.7017	0	0
82.8017	1	1
82.9017	0	1
83.0017	1	1
83.1017	0	1
83.2017	1	2
83.3017	1	0
83.4017	1	1
83.5017	0	0
83.6017	1	1
83.7017	0	0
83.8017	0	2
83.9017	1	1
84.0017	0	1
84.1017	0	1
84.2017	0	2
84.3017	1	1
84.4017	0	1
84.5017	1	1
84.6017	0	1
84.7017	1	1
84.8017	1	1
84.9017	0	1
85.0017	1	1
85.1017	1	1
85.2017	1	1
85.3017	0	1
85.4017	0	1
85.5017	1	1
85.6017	0	1
85.7017	1	1
85.8017	0	1
85.9017	1	1
86.0017	1	1
86.1017	1	1
86.2017	1	1
86.3017	0	1
86.4017	0	1
86.5017	0	1
86.6017	1	1
86.7017	1	1
86.8017	1	1
86.9017	1	1
87.0017	0	1
87.1017	1	1
87.2017	1	1
87.3017	1	0
87.4017	1	1
87.5018	1	1
87.6018	1	1
87.7018	1	0
87.8018	1	0
87.9018	1	1
88.0018	1	0
88.1018	1	1
88.2018	1	0
88.3018	1	1
88.4018	0	0
88.5018	0	0
88.6018	0	1
88.7018	0	1
88.8018	0	1
88.9018	1	1
89.0018	0	1
89.1018	0	1
89.2018	0	0
89.3018	0	1
89.4018	0	1
89.5018	0	1
89.6018	0	0
89.7018	0	0
89.8018	0	1
89.9018	0	0
90.0018	0	1
90.1018	0	1
90.2018	0	1
90.3018	0	1
90.4018	0	1
90.5018	0	1
90.6018	0	1
90.7018	0	1
90.8018	0	0
90.9018	0	1
91.0018	0	0
91.1018	0	0
91.2018	0	1
91.3018	0	0
91.4018	0	1
91.5018	0	0
91.6018	0	0
91.7018	0	1
91.8018	0	1
91.9018	1	1
92.0018	1	1
92.1018	1	0
92.2018	1	1
92.3018	1	1
92.4018	1	0
92.5019	1	1
92.6019	1	0
92.7019	0	0
92.8019	0	1
92.9019	0	0
93.0019	0	1
93.1019	0	1
93.2019	0	1
93.3019	0	1
93.4019	0	1
93.5019	0	1
93.6019	0	1
93.7019	0	1
93.8019	0	1
93.9019	0	0
94.0019	0	1
94.1019	0	2
94.2019	0	1
94.3019	0	0
94.4019	0	0
94.5019	0	1
94.6019	0	1
94.7019	0	0
94.8019	0	0
94.9019	0	0
95.0019	0	0
95.1019	0	0
95.2019	0	0
95.3019	0	1
95.4019	0	0
95.5019	0	1
95.6019	0	1
95.7019	0	1
95.8019	0	1
95.9019	0	1
96.0019	0	1
96.1019	0	0
96.2019	0	0
96.3019	0	1
96.4019	0	1
96.5019	0	0
96.6019	0	3
96.7019	0	1
96.8019	0	0
96.9019	0	0
97.0019	0	0
97.1019	0	1
97.2019	0	0
97.3019	0	1
97.4019	0	1
97.5019	0	1
97.602	0	0
97.702	0	0
97.802	0	0
97.902	0	1
98.002	0	1
98.102	0	1
98.202	0	1
98.302	0	0
98.402	0	0
98.502	0	0
98.602	0	0
98.702	0	1
98.802	0	0
98.902	0	0
99.002	0	0
99.102	0	1
99.202	0	1
99.302	0	0
99.402	0	1
99.502	0	0
99.602	0	0
99.702	0	1
99.802	0	0
99.902	0	1
100	0	1
